# Supplementary material
Source: PubMed Central journal article supplement (PMC6644741)
Supplement: ao7b01291_si_001.pdf [file ao7b01291_si_001.pdf]

**Surface Active Ionic Liquid Cholinium Dodecylbenzenesulfonate: Self-Assembling Behaviour and Interaction with Cellulase**

Praveen Singh Gehlot†, Akshay Kulshrestha‡, Pankaj Bharmoria†, Krishnaiah Damarla†, Kaumeel Chokshi†, Arvind Kumar†‡\*

†Academy of Scientific and Innovative Research (AcSIR), Central Salt and Marine Chemicals Research Institute, G. B. Marg Bhavnagar-364002, Gujarat, India.

‡Salt and Marine Chemicals Discipline, Central Salt, and Marine Chemicals Research Institute, G. B. Marg Bhavnagar-364002, Gujarat, India.

\*Corresponding Author E-mail: mailme\_arvind@yahoo.com; arvind@csmcri.res.in Tel.: +91-278-2567039. Fax: +91-278-2567562.

## Table of content

|                                                                                                                                                             |                |
|-------------------------------------------------------------------------------------------------------------------------------------------------------------|----------------|
| <b>Annexure 1</b>                                                                                                                                           | <b>Page S3</b> |
| <b>Annexure 2</b>                                                                                                                                           | <b>Page S5</b> |
| <b>1. Figure S1: A model of cellulase from <i>Trichoderma reesei</i> (fungi) based on template 1EGN PDB85 file using Visual Molecular Dynamic software.</b> | <b>Page S5</b> |
| <b>2. Figure S2: Chemical structure of Cho[DBS].</b>                                                                                                        | <b>Page S5</b> |
| <b>3. Figure S3: <sup>1</sup>HNMR spectrum at 200MHz Cho[DBS] in DMSO-d<sub>6</sub>.</b>                                                                    | <b>Page S6</b> |
| <b>4. Figure S4: Polynomial reduction in surface tension of water as function of Na[DBS] in aqueous medium at 298.15 K. (CMC= 2.9 mmol.L<sup>-1</sup>).</b> | <b>Page S7</b> |
| <b>5. Figure S5: Specific and Molar conductance of [Na]DBS at 298.15K in aqueous medium (CMC= 3.4 mmol.L<sup>-1</sup>).</b>                                 | <b>Page S7</b> |
| <b>6. Figure S6: Autocorrelation function of cellulase in Cho[DBS] solution.</b>                                                                            | <b>Page S8</b> |
| <b>7. Figure S7: Variation in the size of cellulase with concentration of Cho[DBS].</b>                                                                     | <b>Page S8</b> |
| <b>Reference</b>                                                                                                                                            | <b>Page S9</b> |

## Supporting information

### Annexure 1.

1. The Adsorption efficiency of surfactant at air-water interface is estimated by measuring  $pC_{20}$  using the relation (1)

$$pC_{20} = -\log C_{20} \dots \dots \dots (1)$$

where,  $C_{20}$  is the concentration needed to reduce the surface tension of the solvent (water in the present case) by  $20\text{mN.m}^{-1}$ . The higher  $pC_{20}$  value indicates high adsorption efficiency of the surfactant<sup>1</sup>.

2. The effectiveness of surface tension reduction is the other parameter that measures the adsorption efficiency of a surfactant, denoted by  $\pi_{CMC}$  and calculated using the relation (2).

$$\pi_{CMC} = \gamma_{H_2O} - \gamma_{CMC} \dots \dots \dots (2)$$

where  $\gamma_{H_2O}$  stands for the surface tension of the pure water and  $\gamma_{CMC}$  stands for the surface tension of the solvent medium at CMC<sup>1</sup>.

3. The amount of surfactants adsorbed at the interface is estimated from relative surface excess concentration ( $\Gamma_{max}$ ). The values  $\Gamma_{max}$  of at the CMC have been calculated using Gibbs adsorption Eq. 3 from the least-squares slope of the  $\gamma$  versus  $\log C$  plot.

$$\Gamma_{max} = -\frac{1}{nRT} \frac{\partial \gamma}{\partial \ln C} \dots \dots \dots (3)$$

Where “ $\partial \gamma / \partial \ln C$ ” is the slope of  $\gamma - \ln C$  the plot in the pre-CMC region.<sup>5-7</sup> and n is Gibbs adsorption coefficient. In the current paper, it is used 2 due to ionic dissociation of [Chol]DBS in an aqueous medium<sup>1</sup>.

4. The minimum area occupied by monomers at the interface was calculated using equation 4.

$$A_{min} = \frac{10^{16}}{\Gamma_{max} \cdot N_A} \dots \dots \dots (4)$$

Where  $N_A$  is Avogadro number and the factor of  $10^{16}$  arises as a conversion factor of the area from  $\text{nm}^2$  to  $\text{\AA}^1$ .

5. Gibbs free energy of micellization :

$$\Delta G_{mic}^o = (1 + \beta)RT \ln X_{cmc} \dots \dots \dots (5)$$

Where  $\beta$  is the  $1-\alpha$  and  $\alpha$  has been calculated from conductivity measurement.  $\alpha$  is the ratio of the slope of the post-CMC region and pre-CMC region<sup>1</sup>.

6. Gibbs Free energy of adsorption<sup>1</sup>:

$$\Delta G_{ad}^o = \Delta G_{mic}^o - \frac{\pi_{CMC}}{\Gamma_{max}} \dots \dots \dots (6)$$

7. Enzyme activity (IU):

$$IU = \frac{C}{M \times t \times V} \dots \dots \dots (7)$$

The  $c$  = concentration of sugar released,  $M$  is molecular weight of sugar,  $t$  is a time of incubation and  $V$  is the volume of enzyme used<sup>2</sup>.

8. Kaputinskii equation:

$$U_L = -K \frac{v |z^+| |z^-|}{r^+ r^-} \left( 1 - \frac{d}{r^+ r^-} \right) \dots \dots \dots (1)$$

Where  $U_L$ ,  $z$ ,  $r$ , and  $v$ , represent the lattice enthalpy, ion charges, radii and stoichiometric coefficient (e.g. 2 for NaCl) respectively. The terms  $K$  and  $d$ , are salt specific constants<sup>3</sup>.

## Annexure 2.

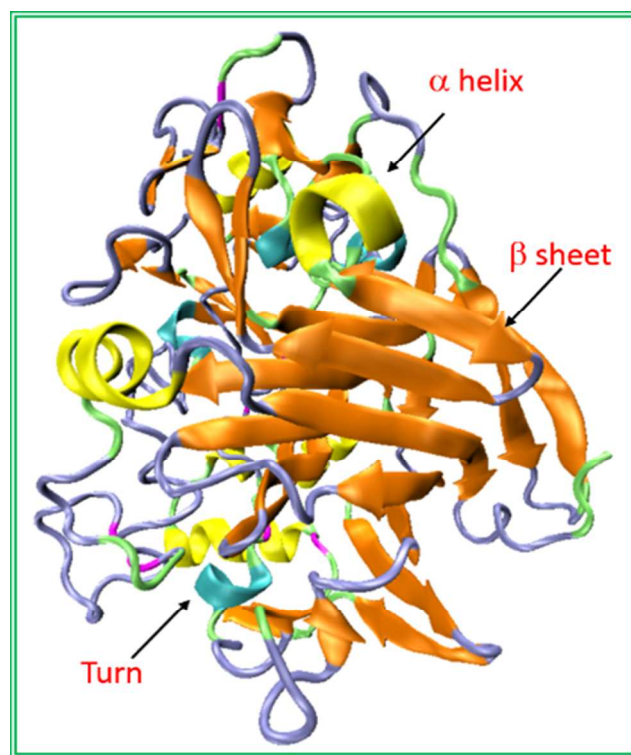

**Figure S1.** A model of cellulase from *Trichoderma reesei* (fungi) based on template 1EGN PDB85 file using Visual Molecular Dynamic software.

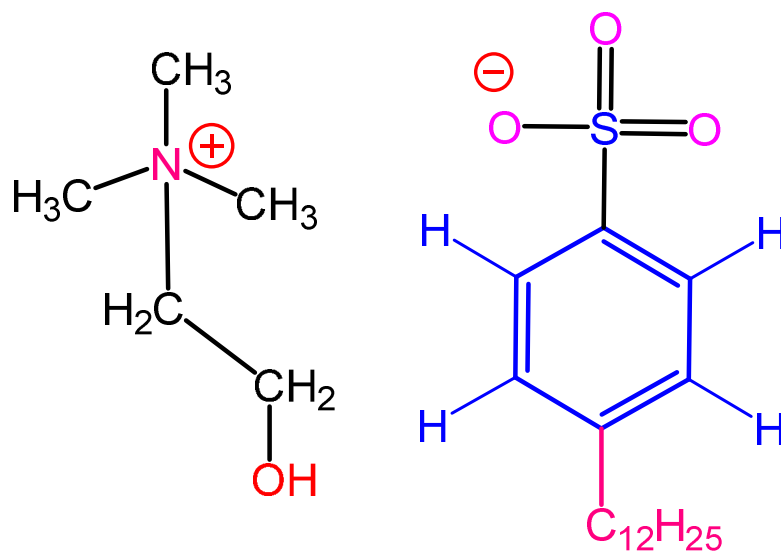

**Figure S2.** Chemical structure of Cho[DBS].

The  $^1\text{H}$  NMR spectrum of synthesized Cho[DBS] was recorded in deuterated DMSO using a Brüker 200 MHz spectrometer. Before measurement, Cho[DBS] was dried in vacuum oven.

$^1\text{HNMR}$  200 MHz: Cho[DBS]. In DMSO- $d_6$  Chemical shift value for proton ( $\delta_{\text{H}}$ ) in ppm: 7.517(d, 2H of  $-\text{S}-\text{C}=\text{CH}-$ ), 7.100 (d, 2H of  $\text{C}-\text{C}=\text{CH}-$ ), 3.818 (m, 2H of  $\text{N}-\text{CH}_2-\text{CH}_2-\text{O}$ ), 3.390 (t, 2H  $\text{N}-\text{CH}_2-\text{CH}_2-\text{O}$ ), 3.097 (s, 9H of  $3\times -\text{CH}_3$ ), 1.429 (m), 1.170 (m), 0.800 (m), 0.684 (t) of  $-\text{C}_{12}\text{H}_{25}$ .

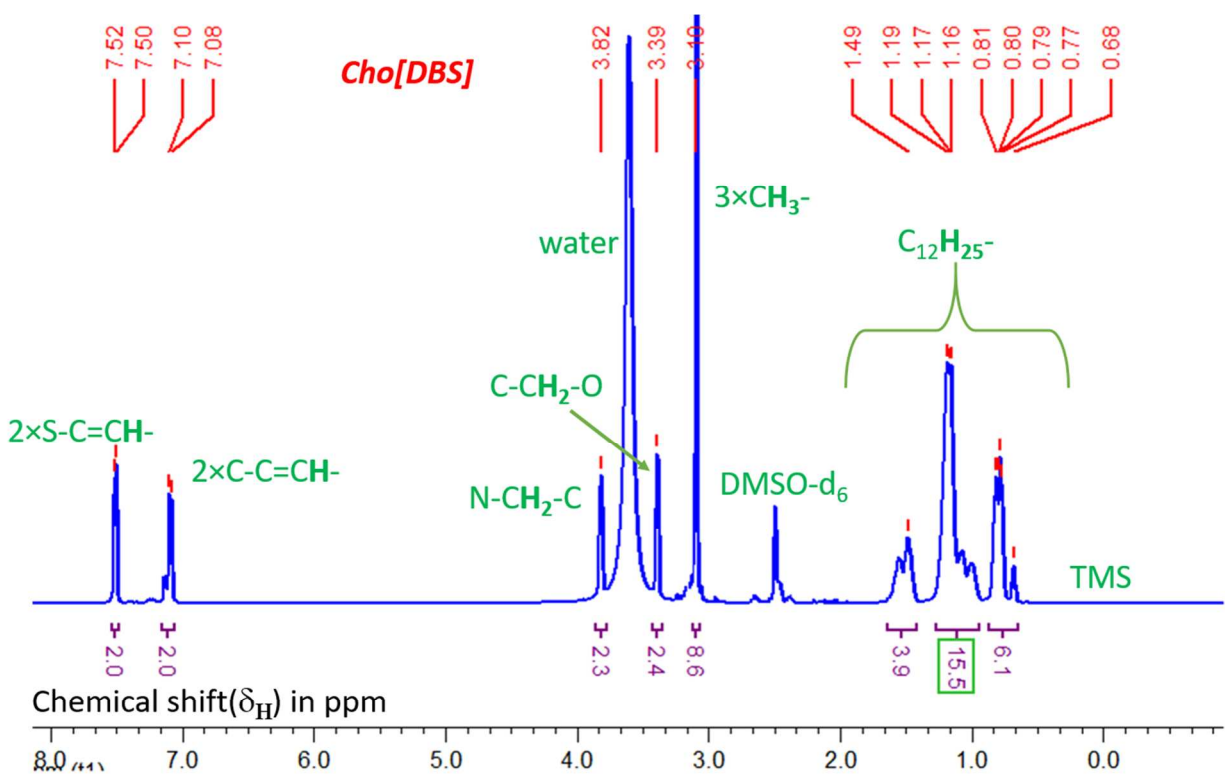

Figure S3.  $^1\text{HNMR}$  spectrum at 200MHz Cho[DBS] in DMSO- $d_6$

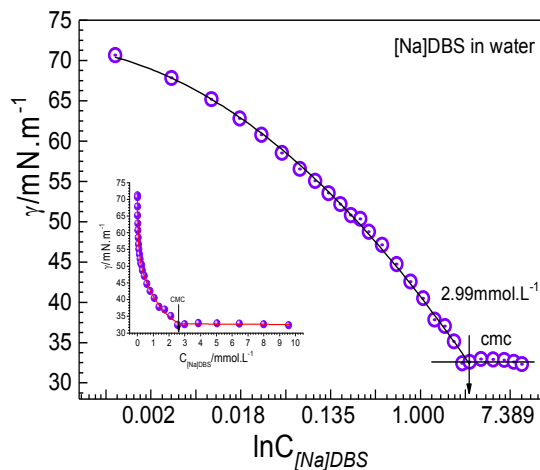

Figure S4. Polynomial reduction in surface tension of water as function of Na[DBS] in aqueous medium at 298.15 K. (CMC= 2.9 mmol.L<sup>-1</sup>)

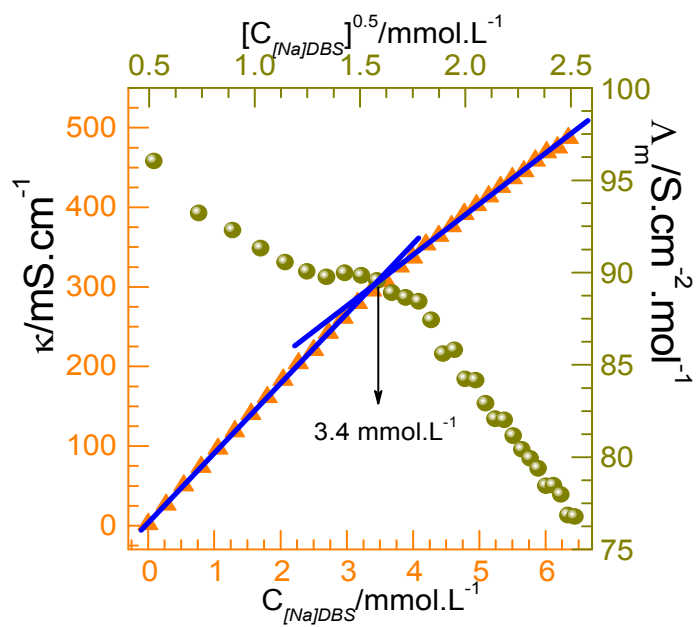

Figure S5. Specific and Molar conductance of [Na]DBS at 298.15K in aqueous medium (CMC= 3.4 mmol.L<sup>-1</sup>)

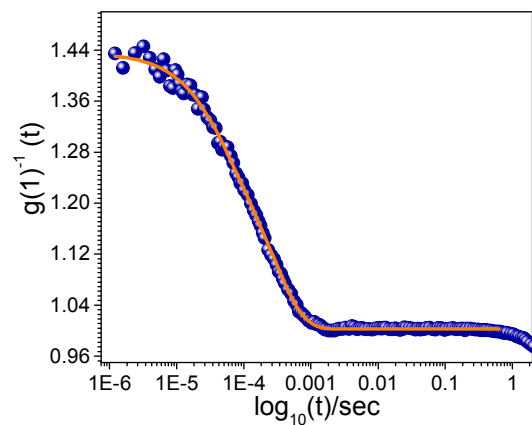

**Figure S6. Autocorrelation function of cellulase in Cho[DBS] solution.**

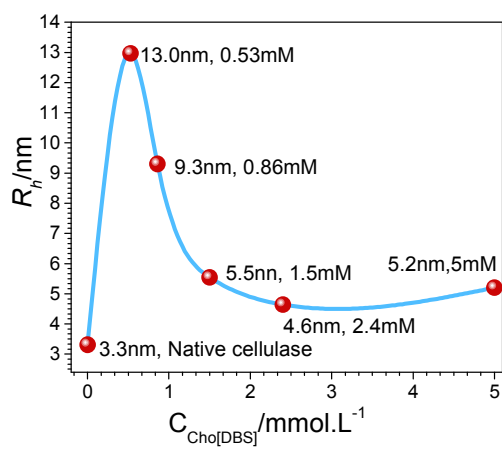

**Figure S7. Variation in the size of cellulase with concentration of Cho[DBS].**



## Reference:

1. Gehlot, P. S.; Rao, K. S.; Bharmoria, P.; Damarla, K.; Gupta, H.; Drechsler, M.; Kumar, A., Spontaneous Formation of Multiarchitecture Vesicles of [C8mim]Br + [Na]DBS in Aqueous Medium: Synergic Interplay of Electrostatic, Hydrophobic, and pi-pi Stacking Interactions. *J Phys Chem B* **2015**, *119*, 15300-9.
2. Bharmoria, P.; Mehta, M. J.; Pancha, I.; Kumar, A., Structural and functional stability of cellulase in aqueous-biamphiphilic ionic liquid surfactant solution. *The Journal of Physical Chemistry B* **2014**, *118*, 9890-9899.
3. Kapustinskii, A., Lattice energy of ionic crystals. *Quarterly Reviews, Chemical Society* **1956**, *10*, 283-294.
